# Supplementary material for: Inter-rater and test-retest reliabilities of lumbar stiffness measurement in the postero-anterior direction using a portable algometer and the Kinovea program
Source: PeerJ. 2023 Oct 2;11:e16148. doi: 10.7717/peerj.16148 (PMC10552765; doi:10.7717/peerj.16148)
Supplement: Supplemental Information 1 [file peerj-11-16148-s001.xlsx]

## Sheet: Displacement_L1
Subject	D1		D2
	PT1	PT2	PT1	PT2
1	n/a	7.57895	1.94805	3.5122
2	2.68817	1.28755	3.25	3.43066
3	4.81818	n/a	9.22772	7.20833
4	n/a	1.89873	2.25641	4.21053
5	5.22581	4.20833	6.8	3.32673
6	6.54826	4.81818	4.57143	3.63636
7	4.89873	7.53846	3.31034	5.01887
8	1.59574	n/a	0.990099	2.37565
9	3.92453	2.37333	3.31217	5.7037
10	3.02778	n/a	2.8	4.34123
11	2.9697	2.78261	5.79661	4.15217
12	4.35443	4.42424	10.1887	8.28169
13	4.60606	3.77143	4.44335	5.65714
14	n/a	5.8	2.45378	5.40351
15	4.04545	3.43548	4.50769	5.01266
16	4.14286	5.8	5.24561	5.63441
17	6.2381	5.91398	9.09091	4.51948
18	13.7037	6.9697	11.2	9.59524
19	3.73913	4.05263	3.65714	3.77143
20	2.4539	2.02439	8.68817	6.53465
21	5.00709	9.74194	6.81818	8.64516
22	4.40909	3.18095	4.19858	4.10286
23	2.34483	5.54348	3.4902	4.3913
24	4.05	7.45161	8	7.27273
25	2.65041	5.03226	5.31148	4.40909
26	8.21266	8.58824	8.5	7.80952
27	5.63077	8.90323	7.5	10.1111
28	4.54545	4.29867	8.45161	8.92308
29	7.5	7.48387	4.8	4.81818
30	4.55652	6.09901	4.66667	7.45161

## Sheet: Displacement_L2
Subject	D1		D2
	PT1	PT2	PT1	PT2
1	5.28571	2.51064	4.72727	3.34454
2	4.33333	2.43537	4.90756	3.26241
3	n/a	5.46392	5.60606	5.52273
4	3.29787	6	2.96774	7.91753
5	5.46835	5.91753	4.65455	3.2
6	6.72941	4.02062	7.21818	9.16129
7	4.81818	3.16522	7.30667	2.52273
8	4.87111	4.4	5.11111	4.25
9	4.81275	6.53465	3.54545	3.20455
10	3.41969	5.60656	7.40594	4.19858
11	4.85965	3.65217	5.91398	2.21505
12	3.01266	5.75758	6.64789	7.77778
13	11.125	6.9697	3.7037	3.76159
14	5.62025	7.49398	3.52222	4.88525
15	8.30435	4.7619	4.54762	4.0597
16	5.78667	7.02857	5.47368	3.46392
17	3.87097	8.26415	6.0303	10.9091
18	13.8491	14.6133	10.9032	8.86792
19	5.05882	2.69231	3.60656	5.45161
20	2.78261	2.78351	1.89873	3.46207
21	7.67925	6.69231	6.94737	10.8679
22	4.22785	4.72	4.48	3.65854
23	3.88732	4.05714	3.63441	3.17722
24	5.18072	5.04545	7.63636	11.0286
25	3.15152	4.26667	4.5567	2.21212
26	3.67925	6.04082	9.16129	9.48485
27	8.51136	5.09091	10.0455	8.64516
28	6.28571	5.60656	9.02857	4.68817
29	5.5	6.86792	6.54762	4.74194
30	4.94309	3.52727	4.85333	4.58182

## Sheet: Displacement_L3
Subject	D1		D2
	PT1	PT2	PT1	PT2
1	3.68182	4.27723	5.6	4.34483
2	4.5679	2.19858	6.38095	6.16766
3	6.5283	9.54286	7.65306	8
4	10	9.47368	6.18182	7.13953
5	8.40602	6.16129	6.81818	3.27619
6	10.9504	7.83893	3.75887	6.23232
7	7.08943	4.07353	8.09091	3.08943
8	2.58333	1.75439	3.64384	1.36364
9	8	3.4557	1.94805	3.93043
10	2.4557	3.13924	4.91176	5.16129
11	4.07874	5.57895	3.85455	2.04545
12	10.1515	7.46835	14.1818	12.6829
13	10.9231	2.89899	5.19588	3.79747
14	4.88889	2.42424	6.08	6.04553
15	9.27835	5.45161	5.90476	3.87692
16	6.26733	7.38095	3.20833	4.96774
17	12.1739	11.0909	9.8	10.3448
18	21.875	12.9474	14.25	9.79661
19	2.68182	3.21212	6.02273	3.91753
20	3.29167	7.05882	8.74227	4.89091
21	8.78889	5.90476	8.81818	12.5567
22	3.07801	6.51064	3.43066	2.69231
23	4.03509	3.1195	3.52273	4.49091
24	9.26761	6.15504	11.4545	11.2727
25	3.53125	3.52113	5.4902	3.24561
26	8.375	8.92308	11.7867	3.18072
27	4.45455	4.77333	8.09091	9.15
28	8.85714	5.88732	4.25	4.0303
29	4.09091	2.02667	6.51429	6.75
30	4.52973	6.81818	6.02817	3.52273

## Sheet: Displacement_L4
Subject	D1		D2
	PT1	PT2	PT1	PT2
1	3.59281	n/a	4.52321	6.03509
2	6.74227	1.70455	7.27731	6.375
3	5.34454	3.76238	7.66667	7.86555
4	n/a	10.5882	10.5378	4.36242
5	7.75	5.84906	7.54667	9.35238
6	6.68817	8.31818	8.54545	7.30612
7	5.03896	3.53103	6.44211	2.73418
8	6.28571	3.67925	4.85965	4.58182
9	10.3448	8.48649	7.74194	7.4
10	3.24561	2.49655	1.85185	1.79641
11	2.65693	3.77922	4.30508	3.44974
12	14.2083	18.96	14.0282	11.2632
13	10.0303	9.89333	9.48485	6.30303
14	3.22772	8.43902	6.92727	4.90323
15	12.953	6.48649	8.02062	9.59524
16	9.81102	9.5122	5.73913	7.30612
17	14.8679	10.6479	14.4545	11.1613
18	16.8182	9.13924	14.2273	6.88525
19	6.43902	5.19328	7.40594	4.76596
20	5.54667	9.34454	6.51429	4.80682
21	16.807	14.2273	13.0227	12.2817
22	7.125	9.66667	5.22581	6.03509
23	8.15152	5.43396	8.08772	4.68354
24	14.1754	11.4035	16.5	17.4839
25	3.60656	3.67925	7.76238	4.58696
26	5.91398	10.5714	14.05	4.72727
27	9.13924	8.34286	10.3774	12.9032
28	8.80702	5.08108	7.31148	6.10309
29	6.20588	4.1087	8.12658	8.88525
30	6.92784	4.55652	7.58416	5.48485

## Sheet: Displacement_L5
Subject	D1		D2
	PT1	PT2	PT1	PT2
1	5.24	6.98	6.31579	10.125
2	6.88372	6.39301	7.83505	4.70297
3	7.1134	6.67797	11.5	9.31818
4	6.62069	8.58333	7.84906	6.34483
5	6.93913	n/a	8.22727	7.44
6	8.13333	8.93333	14.1515	13.6344
7	8.26415	6.88312	10.5567	9.05882
8	8.52326	5.54783	6.46715	3.94161
9	8.31818	9.63441	9.40909	12.6316
10	2.24339	4.2381	4.49091	6.49091
11	8.02381	4.94309	7.83673	4.01818
12	10.9231	8.37398	13.2403	8.90909
13	8.34595	6.21212	7.10345	9.20755
14	10.0138	3.52273	10.3068	10.3544
15	11.5938	8.86792	12.084	6.31818
16	10.2156	10.2276	7.54667	4.56842
17	13.6571	11.2	9.77143	7.50943
18	13.8491	11.5273	12.8679	8.74194
19	5.12752	5.89333	8.49655	5.18072
20	10.695	7.49398	14.0123	11.5952
21	16.6316	13.8	15.6136	14.8533
22	8.01342	12.6479	6.9816	6.72727
23	10.48	7.35	10.2083	5.40909
24	n/a	16.8529	15.2	11.3478
25	3.26136	3.83505	9.55556	5.34783
26	9.77143	8.52273	8.45455	7.52727
27	12.5217	7.1134	14.4	10.0645
28	12.4	5.92157	11.1807	7.48485
29	12.05	6.37736	8.01887	10.5
30	6.82353	4.45378	10.5283	6.91139

## Sheet: Stiffness_L1
Subject	D1		D2
	PT1	PT2	PT1	PT2
1	n/a	1.9411	5.685	4.02
2	4.7886	4.54	5.785	4.375
3	2.4508	n/a	2.2196	2.2571
4	n/a	2.9054	3.345	3.365
5	5.6429	3.7571	3.0405	4.585
6	4.09	3.4214	4.1214	3.2429
7	5.371	2.32	4.765	3.695
8	5.8834	n/a	7.4898	7.0096
9	5.4649	3.6912	5.89	1.9926
10	4.4375	n/a	4.555	5.37
11	5.5292	3.78	3.634	4.5441
12	3.4543	3.0186	2.5298	2.0083
13	4.155	3.075	4.591	3.2461
14	n/a	2.3826	4.44	2.959
15	3.7716	2.5443	2.875	3.5366
16	3.4175	2.3826	3.25	3.1845
17	3.5875	2.93	2.0919	4.36
18	1.1825	1.8321	1.3617	2.1705
19	4.05	2.96	4.228	3.9729
20	6.475	4.34	2.0471	2.815
21	3.44	1.8661	2.7339	1.9154
22	4.2	4.1325	4.4299	3.885
23	4.95	2.6047	4.358	4.2818
24	3.4867	2.471	1.4708	1.749
25	5.825	2.9954	3.615	3.76
26	2.1271	1.7385	1.8357	2.2679
27	3.355	2.0277	2.1401	1.3414
28	3.2466	3.8224	2.3727	2.072
29	2.0976	1.9498	2.8216	3.1
30	3.8	3.075	3.7735	2.6357

## Sheet: Stiffness_L2
Subject	D1		D2
	PT1	PT2	PT1	PT2
1	3.7286	4.2049	3.5397	4.6
2	4.8745	3.895	4.175	5.325
3	n/a	3.5629	2.9262	3.2318
4	4.0943	2.7	4.11	2.7194
5	4.7229	2.7182	3.925	5.1281
6	4.1767	4.125	3.3966	2.4077
7	4.8157	3.2446	3.3396	4.3211
8	5.4308	2.9854	4.61	3.605
9	3.826	3.0582	4.5876	4.1183
10	4.5033	3.1983	4.4524	5.0613
11	4.1843	5.085	3.3732	5.2415
12	2.9738	2.4474	2.9936	2.1207
13	1.9442	2.4614	4.0829	3.365
14	3.3392	1.7598	4.2	3.1494
15	3.1451	3.5463	3.6512	3.225
16	2.5785	2.4339	3.3671	3.0142
17	3.9256	2.4179	2.5176	1.6678
18	1.4727	1.8524	1.1771	1.5542
19	3.23	4.3488	3.1995	2.66
20	4.683	5.455	3.336	4.725
21	2.6857	2.5343	3.3411	1.6019
22	4.595	4.31	4.49	3.5267
23	3.5268	2.5214	4.155	4.9945
24	3.1324	3.96	1.7825	1.4965
25	5.15	3.4024	3.8854	5.01
26	3.055	2.4686	1.9343	1.8767
27	2.8451	3.3286	1.903	1.6933
28	2.6101	2.435	1.9179	3.564
29	3.19	2.0036	3.069	2.2271
30	3.515	4.0162	3.7386	3.9

## Sheet: Stiffness_L3
Subject	D1		D2
	PT1	PT2	PT1	PT2
1	3.4122	4.015	4.6993	3.8286
2	5.505	6.645	4.3509	4.0237
3	3.2183	1.8827	3.4833	2.3964
4	2.5631	2.7304	3.4237	2.8743
5	3.1516	3.5554	3.7224	3.9108
6	2.7525	3.2567	3.8029	2.6518
7	3.9179	4.1229	3.4856	4.336
8	5.4756	3.84	6.4062	5.1492
9	3.0982	3.6528	4.945	3.455
10	5.0643	5.87	5.4328	2.9157
11	5.3571	2.3708	4.5756	3.715
12	2.305	2.8953	1.2525	1.6897
13	1.7333	4.4142	3.3286	3.4984
14	3.7457	3.96	2.9248	3.4751
15	2.6613	3.1251	2.7186	3.55
16	4.0536	3.3852	4.83	3.5514
17	1.9225	1.7565	1.8317	1.8814
18	0.9969	1.7204	1.0963	1.9474
19	5.925	4.29	3.4257	3.785
20	4.5887	3.3446	1.9443	2.9642
21	2.3786	2.7671	2.4188	1.4842
22	4.6128	3.29	3.93	3.89
23	3.4274	4.485	4.5561	3.8318
24	2.0768	3.0384	1.5291	1.7272
25	5.0746	3.05	3.2268	3.7043
26	2.1657	1.9006	1.684	3.0471
27	3.8092	3.85	2.029	1.3767
28	2.0987	3.1657	3.6	3.6537
29	2.4629	5.16	3.4471	2.203
30	4.1914	3.0408	3.505	3.585

## Sheet: Stiffness_L4
Subject	D1		D2
	PT1	PT2	PT1	PT2
1	6.895	n/a	5.4048	3.1129
2	3.5643	5.685	4.3645	3.1609
3	4.1232	3.8276	3.0798	2.4607
4	n/a	2.9399	2.4533	4.3564
5	3.882	3.5567	3.41	2.4475
6	4.1255	3.4892	3.4958	2.5435
7	5.4514	5.2102	4.9852	5.41
8	3.5524	2.4867	4.9857	3.58
9	2.9608	3.3593	3.7821	2.3014
10	5.695	5.91	5.0686	3.6466
11	4.0029	3.0618	5.5089	4.1339
12	2.1064	1.5409	2.0023	1.7911
13	2.9441	3.2394	3.1467	2.8386
14	3.9251	2.7291	3.3226	2.5912
15	2.2264	2.6589	2.5479	2.2339
16	2.7	2.4008	2.9464	2.8284
17	2.0211	1.931	1.6776	2.1337
18	1.4488	2.7482	1.283	2.6554
19	3.035	3.5671	2.875	3.23
20	3.3434	2.7029	2.6375	4.0321
21	1.4618	1.6314	1.7894	1.9
22	2.9964	2.2214	4.62	2.85
23	2.3339	3.3686	2.8289	3.39
24	1.6179	2.065	1.1505	1.1169
25	4.6729	3.2364	2.6186	3.6707
26	2.5727	1.9467	1.2676	3.5486
27	2.7104	2.6836	2.0179	1.3364
28	2.2629	3.0423	3.1007	3.2937
29	3.27	4.4576	2.5911	1.9488
30	2.8425	3.6657	2.8829	3.1439

## Sheet: Stiffness_L5
Subject	D1		D2
	PT1	PT2	PT1	PT2
1	4.7711	3.5375	4.0768	2.757
2	4.2083	4.0786	3.5102	5.2008
3	4.3096	2.8475	2.213	2.1767
4	3.3714	1.9191	3.2196	2.7667
5	4.5711	n/a	3.0742	2.6243
6	4.7858	4.5138	2.2705	1.7941
7	3.6916	4.3301	2.2655	3.0607
8	3.6843	4.2365	4.3304	5.035
9	3.9383	3.4033	3.3688	1.7672
10	6.6606	4.9626	4.8548	3.6311
11	3.0679	4.0363	3.0054	4.4929
12	2.4291	2.9744	2.2695	2.4882
13	3.2018	3.3524	2.9106	2.3258
14	2.1482	3.9485	2.4922	2.0426
15	1.9517	2.7601	1.9882	2.9327
16	2.4637	2.5387	2.9071	4.575
17	2.0136	2.1903	2.3961	2.8018
18	1.5553	2.7991	1.7977	2.27
19	3.7708	4.2072	2.875	3.5359
20	2.0786	3.0663	1.4758	2.0231
21	1.4685	1.5952	1.3814	1.4105
22	2.9894	1.9773	3.62	2.665
23	2.1704	2.3821	1.7958	3.4271
24	n/a	1.2605	1.2464	1.9492
25	4.105	3.71	2.3785	3.315
26	1.735	2.5886	2.0467	2.8964
27	1.9609	2.9018	1.3964	1.6067
28	1.9191	2.5429	2.3809	2.3462
29	1.3418	3.1375	2.9171	1.7481
30	3.0848	3.77	2.2218	3.03
